# Supplementary material for: Far-Red Light Acclimation for Improved Mass Cultivation of Cyanobacteria
Source: PubMed Central journal article supplement (PMC6724174; doi:10.3390/metabo9080170), 2019-08-19
Supplement: metabolites-09-00170-s001.pdf [file metabolites-09-00170-s001.pdf]

**Table 1.** Statistical analysis of composition of *C. fritschii* culture.

| <u>Analysis</u>               | <u>Carbohydrates</u>                                                                                                         | <u>Lipids</u>                 | <u>Proteins</u>                |
|-------------------------------|------------------------------------------------------------------------------------------------------------------------------|-------------------------------|--------------------------------|
| <b>Variable 1</b>             | Day: <b>p= 0.373 ns</b>                                                                                                      | Day: <b>p= 0.742 ns</b>       | Day: <b>p= 0.0503 ns</b>       |
| <b>Variable 2</b>             | Light: <b>p= 0.340 ns</b>                                                                                                    | Light: <b>p= 0.540 ns</b>     | Light: <b>p= 0.5839 ns</b>     |
| <b>Variable 3</b>             | Day*Light: <b>p= 0.211 ns</b>                                                                                                | Day*Light: <b>p= 0.106 ns</b> | Day*Light: <b>p= 0.8976 ns</b> |
| <b>Statistical conclusion</b> | No significant differences: carbohydrates, lipids and proteins content is not different between treatments nor between days. |                               |                                |

**Table 2.** Bioactive compounds produced by *Chlorogloeopsis* sp.

| <b>Products</b>            | <b>Compound</b>                             | <b>Use</b>                                                                                                 | <b>Reference</b> |
|----------------------------|---------------------------------------------|------------------------------------------------------------------------------------------------------------|------------------|
| Photo protective compounds | Mycosporine-like amino-acids (MAA)          | Sun-screen protectant                                                                                      | [1–3]            |
|                            | Scytonemin                                  | Sunscreen pigment                                                                                          | [4]              |
|                            | Chlorophyll <i>a</i>                        | Pharmaceutical and cosmetic (deodorant)                                                                    | [5]              |
| Pigments                   | Phycocyanin                                 | Food colorant (ice cream, sweets) cosmetics, biomedicine: immunofluorescent techniques, antibody labelling | [6]              |
|                            | Zeaxanthin                                  | Use as a compound in treatment of age-related macular degeneration, anticancer activity                    | [7]              |
| Bioplastics                | Polyesters of polyhydroxy alkanooates (PHA) | Thermoplastic comparable to the synthetic plastic, polypropylene                                           | [8]              |
|                            | Polyhydroxybutyrate (PHB)                   | Highly hydrophobic, thermoplastic, biodegradable and biocompatible                                         | [8,9]            |
| Plant growth promoters     | Cytokinin                                   | Promotes cell division in plant roots and shoots                                                           | [10]             |

## References

- Chrapusta, E.; Kaminski, A.; Duchnik, K.; Bober, B.; Adamski, M.; Bialczyk, J. Mycosporine-Like Amino Acids: Potential Health and Beauty Ingredients. *Mar. Drugs* **2017**, *15* (10), 1–29. <https://doi.org/10.3390/md15100326>.
- Kultschar, B.; Dudley, E.; Wilson, S.; Llewellyn, C. A. Intracellular and Extracellular Metabolites from the Cyanobacterium *Chlorogloeopsis Fritschii*, PCC 6912, During 48 Hours of UV-B Exposure. *Metabolites* **2019**, *9* (4), 74. <https://doi.org/10.3390/metabo9040074>.
- Derikvand, P.; Llewellyn, C. a.; Purton, S. Cyanobacterial Metabolites as a Source of Sunscreens and Moisturizers: A Comparison with Current Synthetic Compounds. *Eur. J. Phycol.* **2017**, *52* (1), 43–56. <https://doi.org/10.1080/09670262.2016.1214882>.
- Zhang, G.; Zhang, Z.; Liu, Z. Scytonemin Inhibits Cell Proliferation and Arrests Cell Cycle through Downregulating Plk1 Activity in Multiple Myeloma Cells. *Tumor Biol.* **2013**, *34* (4), 2241–2247. <https://doi.org/10.1007/s13277-013-0764-5>.
- Da Silva Ferreira, V.; Sant'Anna, C. Impact of Culture Conditions on the Chlorophyll Content of Microalgae for Biotechnological Applications. *World J. Microbiol. Biotechnol.* **2017**, *33* (1), 1–8. <https://doi.org/10.1007/s11274-016-2181-6>.
- Tavanandi, H. A.; Mittal, R.; Chandrasekhar, J.; Raghavarao, K. S. M. S. Simple and Efficient

- Method for Extraction of C-Phycocyanin from Dry Biomass of *Arthrospira Platensis*. *Algal Res.* **2018**, *31* (August 2017), 239–251. <https://doi.org/10.1016/j.algal.2018.02.008>.
7. Zuluaga, M.; Gueguen, V.; Pavon-Djavid, G.; Letourneur, D. Carotenoids from Microalgae to Block Oxidative Stress. *BioImpacts* **2017**, *7* (1), 1–3. <https://doi.org/10.15171/bi.2017.01>.
  8. Balaji, S.; Gopi, K.; Muthuvelan, B. A Review on Production of Poly  $\beta$  Hydroxybutyrates from Cyanobacteria for the Production of Bio Plastics. *Algal Res.* **2013**, *2* (3), 278–285. <https://doi.org/10.1016/j.algal.2013.03.002>.
  9. Hein, S.; Steinbüchel, A.; Hai, T. Multiple Evidence for Widespread and General Occurrence of Type-III PHA Synthases in Cyanobacteria and Molecular Characterization of the PHA Synthases from Two Thermophilic Cyanobacteria: *Chlorogloeopsis Fritschii* PCC 6912 and *Synechococcus* Sp. Strain MA1. *Microbiology* **2015**, *147* (11), 3047–3060. <https://doi.org/10.1099/00221287-147-11-3047>.
  10. Singh, J. S.; Kumar, A.; Rai, A. N.; Singh, D. P. Cyanobacteria: A Precious Bio-Resource in Agriculture, Ecosystem, and Environmental Sustainability. *Front. Microbiol.* **2016**, *7* (APR), 1–19. <https://doi.org/10.3389/fmicb.2016.00529>.
